# Supplementary material for: Low dose oral beta-lactamase protects the gut microbiome from oral beta-lactam-mediated damage in dogs
Source: PubMed Central journal article supplement (PMC6940571; doi:10.3934/publichealth.2019.4.477), 2019-11-12
Supplement: publichealth-06-04-477-s001.pdf [file publichealth-06-04-477-s001.pdf]

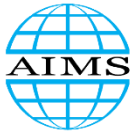

*Research article*

## Low dose oral beta-lactamase protects the gut microbiome from oral beta-lactam-mediated damage in dogs

Sheila Connelly<sup>1,\*</sup>, Brian Fanelli<sup>2</sup>, Nur A. Hasan<sup>2</sup>, Rita R. Colwell<sup>2,3</sup> and Michael Kaleko<sup>1</sup>

<sup>1</sup> Synthetic Biologics, Inc., Rockville, MD, United States

<sup>2</sup> CosmosID, Inc., Rockville, MD, United States

<sup>3</sup> University of Maryland Institute for Advanced Computer Studies, College Park, MD, United States

\* **Correspondence:** Email: [sconnelly@syntheticbiologics.com](mailto:sconnelly@syntheticbiologics.com); Tel: +2402383866.

### Supplementary

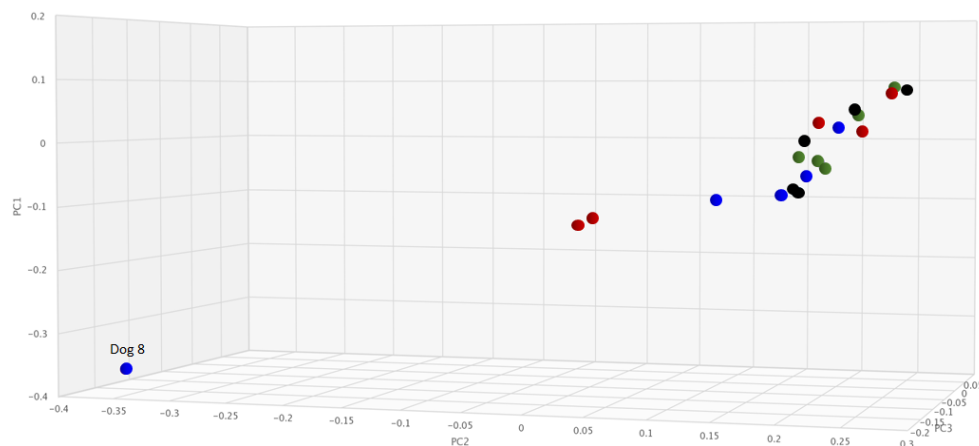

**Supplemental Figure 1.** Principal coordinate analyses of pretreatment fecal microbiomes. Notes: Pretreatment fecal microbiome for each animal was subjected to principal coordinate analysis using Bray-Curtis dissimilarity [19]. Black: Amoxicillin alone; blue: Amoxicillin + SYN-007 (10 mg); red: Amoxicillin + SYN-007 (3 mg); green: Amoxicillin + SYN-007 (1 mg). Dog 8 (Amoxicillin + SYN-007 (10 mg)) pretreatment microbiome sample was considered an outlier based on this analysis.

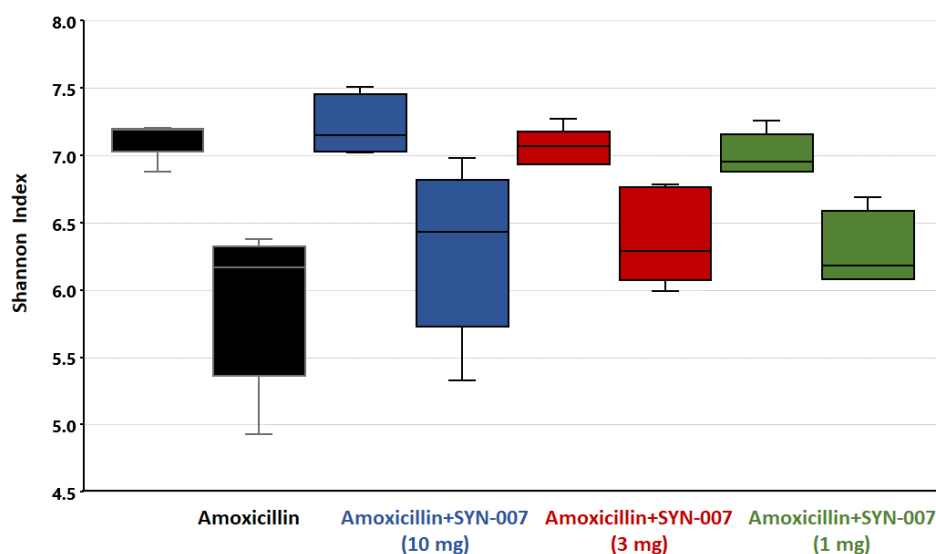

**Supplemental Figure 2.** Comparison of dog fecal microbiome Shannon alpha diversity prior to and after antibiotic treatment including Dog 8 pre and post treatment samples. Notes: Fecal microbiome metagenomics data were analyzed by Shannon index and are displayed for each cohort as box plots ( $n = 5$ ). P values were obtained by comparing pretreatment Shannon indexes (Pre) to post-treatment Shannon indexes (Post) of each cohort using Kruskal-Wallis non-parametric ANOVA with Dunn's Multiple Comparisons test (Graphpad Prism 7). Black, Amoxicillin alone,  $p = 0.0067$ ; blue, Amoxicillin + SYN-007 (10 mg) with Dog 8,  $p = 0.0632$ ; red, Amoxicillin + SYN-007 (3 mg),  $p = 0.1766$ ; green, Amoxicillin + SYN-007 (1 mg),  $p = 0.1951$ . Compare to Figure 2.

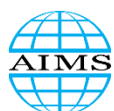

AIMS Press

© 2019 the Author(s), licensee AIMS Press. This is an open access article distributed under the terms of the Creative Commons Attribution License (<http://creativecommons.org/licenses/by/4.0>)
